# Supplementary material for: Tuning Penta-Graphene Electronic Properties Through Engineered Line Defects
Source: PubMed Central journal article supplement (PMC7229116; doi:10.1038/s41598-020-64791-x), 2020-05-15
Supplement: 41598_2020_64791_MOESM1_ESM.pdf [file 41598_2020_64791_MOESM1_ESM.pdf]

**Electronic Supporting Information**  
**For**  
**“Tuning Penta-Graphene Electronic Properties Through Engineered Line Defects”**

Ramiro Marcelo dos Santos<sup>1</sup>, Leonardo Evaristo de Sousa<sup>2</sup>, Douglas Soares Galvão<sup>3</sup>, Luiz Antonio Ribeiro Junior<sup>1</sup>

<sup>1</sup>Institute of Physics, University of Brasilia, 70.919-970, Brasilia, Brazil

<sup>2</sup>Theoretical and Structural Chemistry Group, State University of Goias, 75133-050 Anapolis, Brazil

<sup>3</sup>Applied Physics Department, State University of Campinas, Campinas, SP, 13083-959, Brazil

(Dated: January 16, 2020)

**Projected Density of States:  $sp^3$  Doping Scheme**

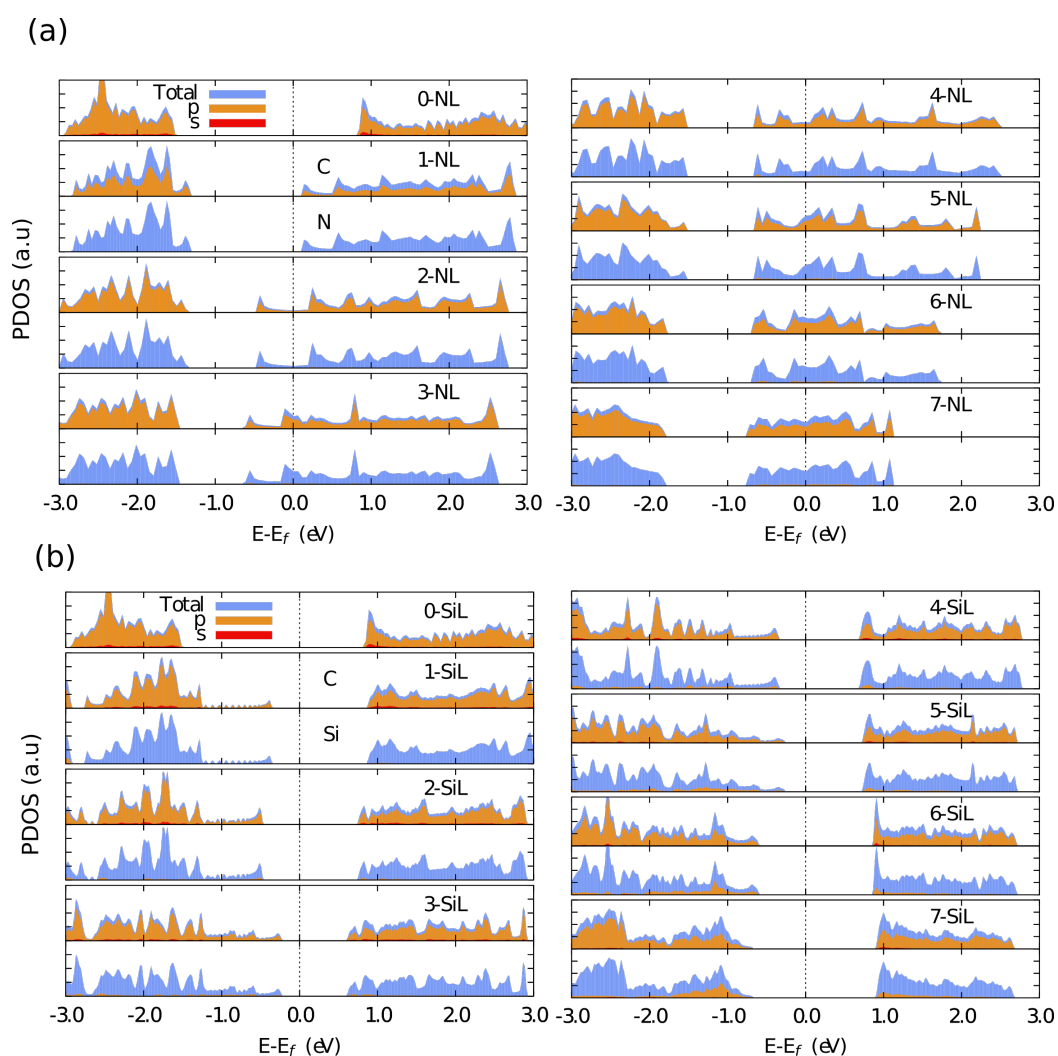

Figure1-ESI: Projected Density of States (PDOS) for all schemes of  $sp^3$  carbon doping considering both (a) Nitrogen and (b) Silicon atoms. In this figure, X-NL and X-SiL denote the number (X) of dopant lines systematically inserted into the penta-graphene structure.

## Projected Density of States: $sp^2$ Doping Scheme

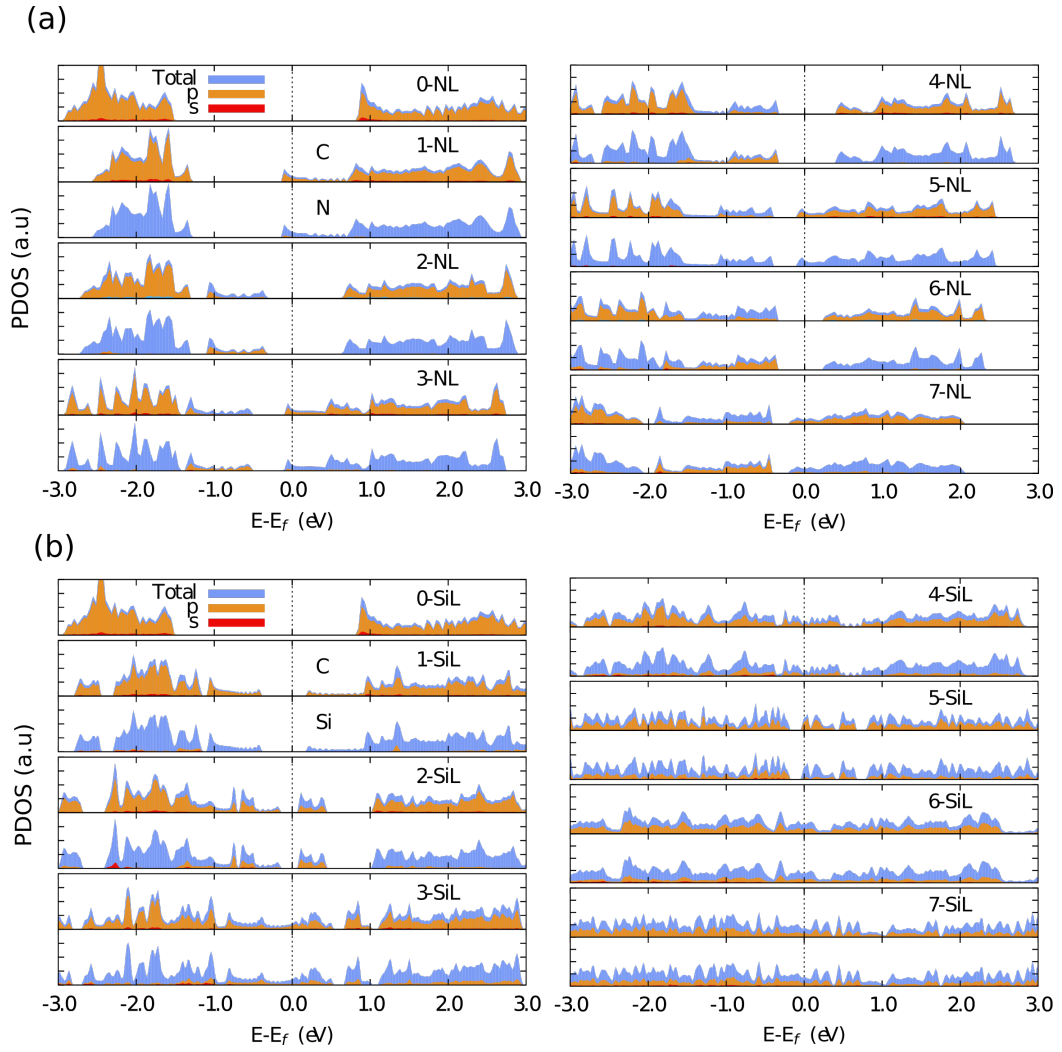

Figure2-ESI: Projected Density of States (PDOS) for all schemes of  $sp^2$  carbon doping considering both (a) Nitrogen and (b) Silicon atoms. In this figure, X-NL and X-SiL denote the number (X) of dopant lines systematically inserted into the penta-graphene structure.
